# Supplementary material for: Decreased Levels of Soluble Developmental Endothelial Locus-1 Are Associated with Thrombotic Microangiopathy in Pregnancy
Source: MDPI journal article supplement (doi:10.3390/ijms241411762), 2023-07-21
Supplement: s1 [file s1]

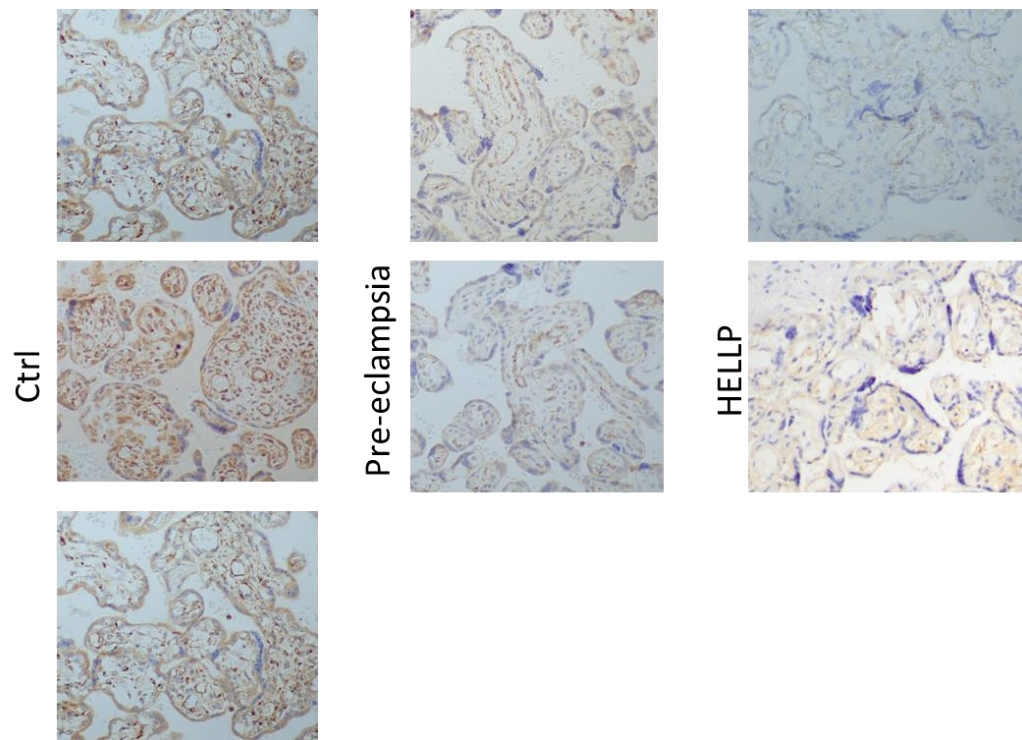

Supplementary Figure S1. Expression of DEL-1 in tissue sections from additionally three women with uncomplicated pregnancies assessed by immuno-histochemistry and two women with preeclampsia and two patients with HELLP syndrome. Magnification 200x
